# Supplementary material for: Coumarin-based composite material for the latent fingerprint visualization and electrochemical sensing of hydrogen peroxide
Source: Royal Society of Chemistry journal article supplement (doi:10.1039/d3su00357d), 2023-12-20
Supplement: d3su00357d1.pdf [file d3su00357d1.pdf]

## **Coumarin Based Composite Material for the Latent Fingerprints Visualization and Electrochemical Sensing of Hydrogen Peroxide**

**Manjunatha B<sup>1</sup>, Yadav D. Bodke<sup>1\*</sup>, Mounesh<sup>2</sup>, Sachin Ashok Bhat.<sup>3</sup>**

*<sup>1</sup>Department of P.G. Studies and Research in Chemistry, Jnana Sahyadri, Kuvempu University  
Shankaraghatta- 577451, Shivamogga, Karnataka, India.*

*<sup>2</sup>Centre for Nano and Material Sciences, Jain (Deemed-to-be University) Jain Global Campus,  
Jakkasandra, Kanakapura, Bangalore 562112, Karnataka, India.*

*<sup>3</sup>Centre for Nano and Soft Matter Sciences (CeNS), Jalahalli, Bengaluru 560 013, India.*

*\*Corresponding author: E-mail: [ydbodke@gmail.com](mailto:ydbodke@gmail.com)*

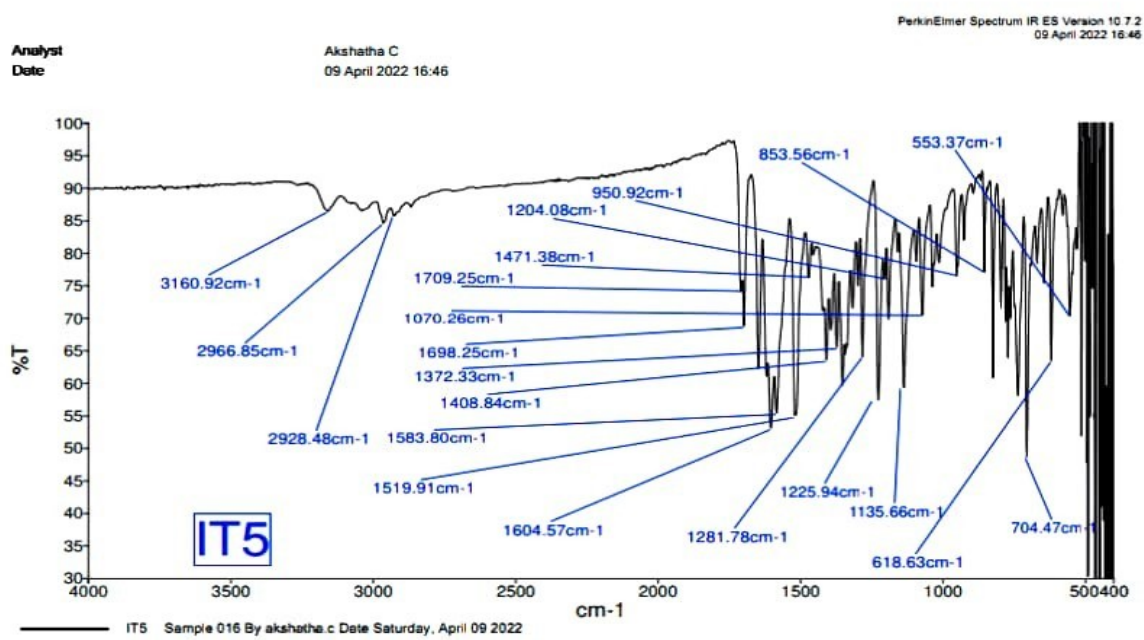

Figure S1: FTIR spectrum of the compound CTH

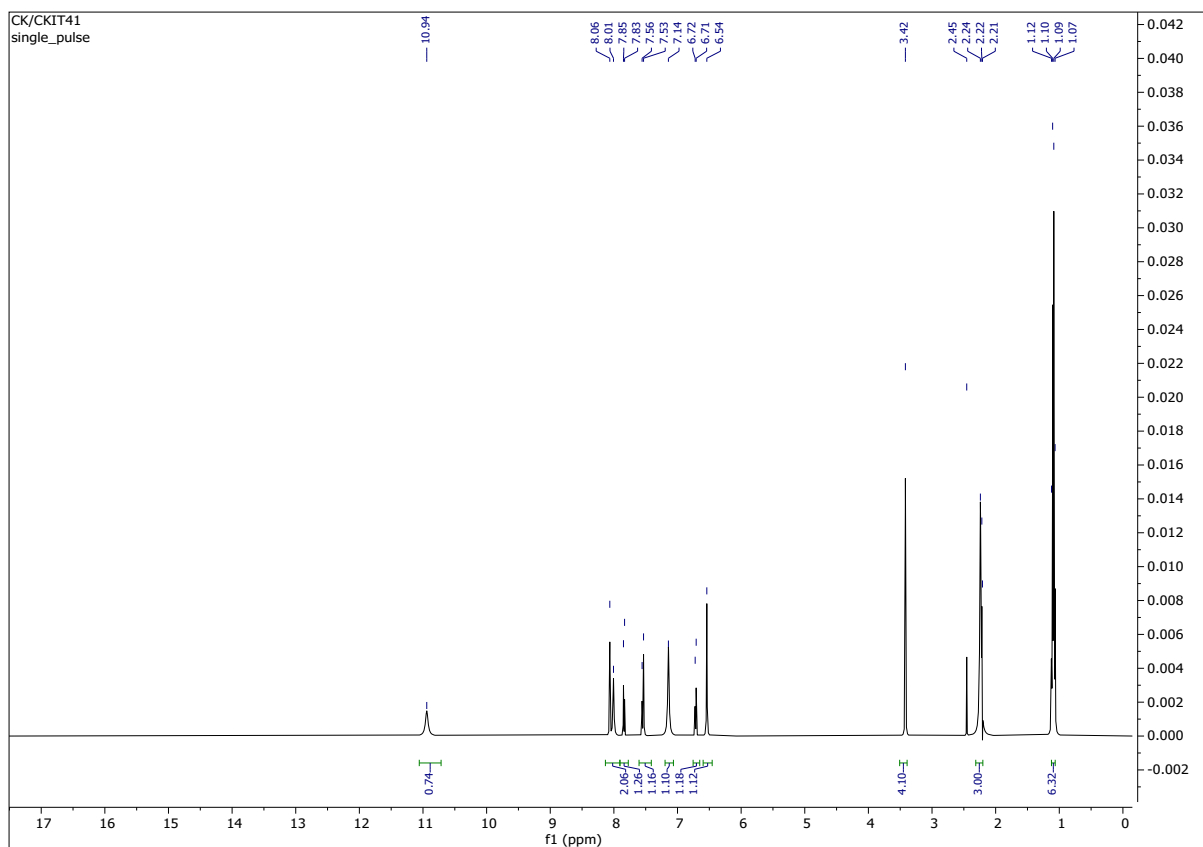

**Figure S2:**  $^1\text{H}$  NMR spectrum of the compound CTH

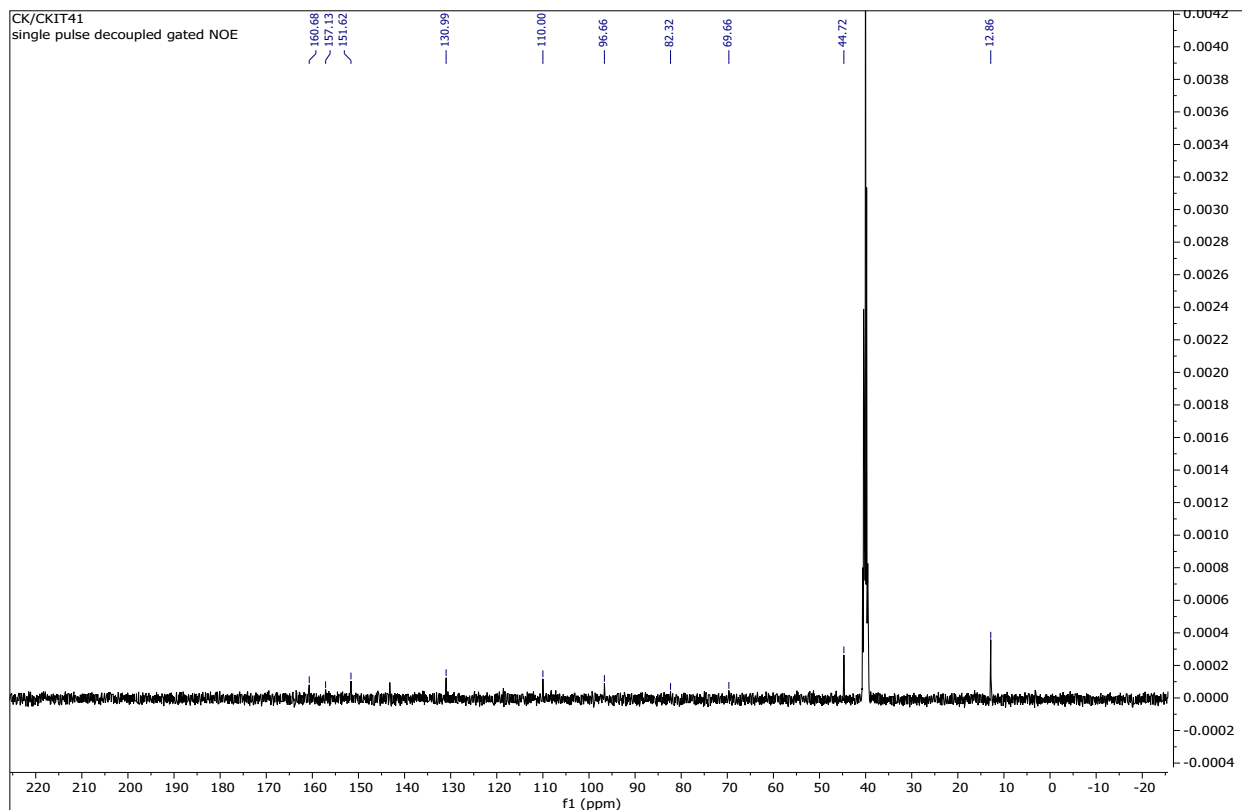

Figure S3:  $^{13}\text{C}$  NMR spectrum of the compound **CTH**

2200546-M1 105 (3.555)

1: TOF MS ES+  
7.03e4

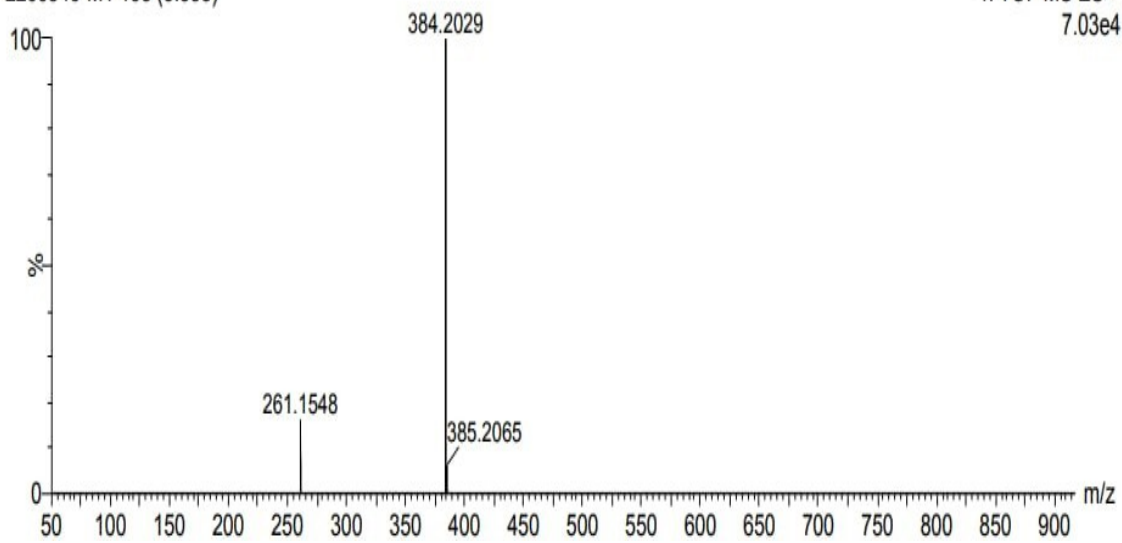

**Figure S4:** HRMS spectrum of the compound **CTH**

**Table S1:** Global reactive parameters calculated for synthesized compound **CTH**

| <b>Parameters</b>                        | <b>CTH</b> |
|------------------------------------------|------------|
| $E_{\text{HOMO}}$ (eV)                   | -5.598     |
| $E_{\text{LUMO}}$ (eV)                   | -2.147     |
| Energy gap ( $\Delta$ ) (eV)             | 3.451      |
| Ionization energy (I) (eV)               | 5.598      |
| Electron affinity (A) (eV)               | 2.147      |
| Electronegativity ( $\chi$ ) (eV)        | 3.872      |
| Chemical potential ( $\mu$ ) (eV)        | -3.872     |
| Global hardness ( $\eta$ ) (eV)          | 1.725      |
| Global softness (S) (eV <sup>-1</sup> )  | 0.289      |
| Electrophilicity index ( $\omega$ ) (eV) | 4.345      |

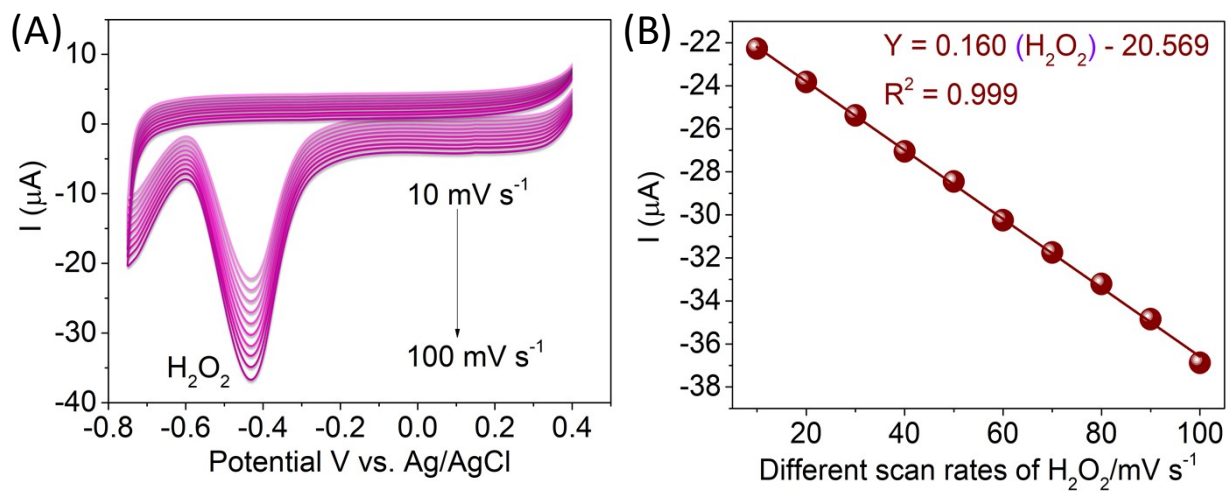

**Figure. S5:** Cyclic voltammogram in 100 nM  $\text{H}_2\text{O}_2$  at: (A) various scan rate ( $10\text{-}100 \text{ mV s}^{-1}$ ) by CTH/MWCNTs modified GC electrode in PBS (pH 7) electrolyte. (B) Linear graph of various scan rates vs. reduction peak currents.

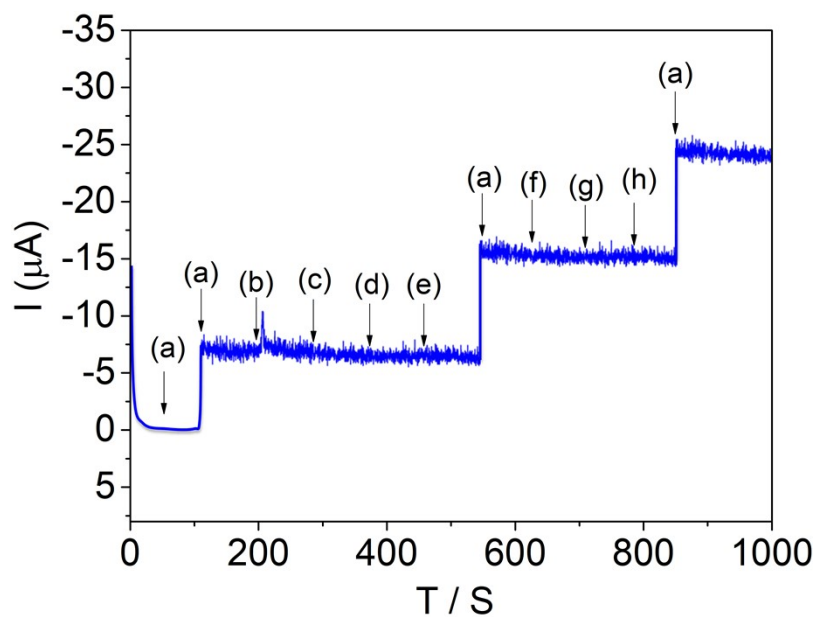

**Figure S6:** Selectivity studies of CTH/MWCNTs modified GC electrode by H<sub>2</sub>O<sub>2</sub> detection (inset (a)) with various biochemical's (inset (b, c, d, e, f, g, h)): At applied potential for 400 mVs<sup>-1</sup>.



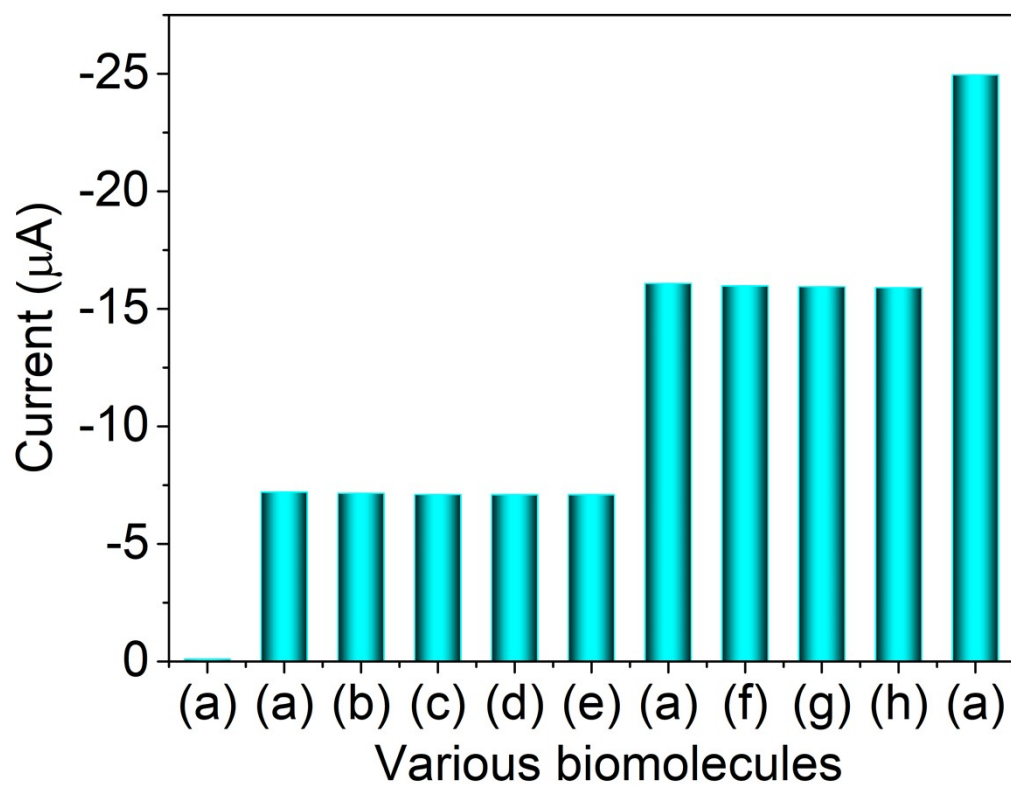

**Figure S7:** Bar graph depicting the sensitivity of  $\text{H}_2\text{O}_2$  sensing in the presence of other interfering agents

**Table S2:** Comparison of the linear range and detection limit of various H<sub>2</sub>O<sub>2</sub> sensors

| <b>Electrodes</b>               | <b>Method</b>       | <b>LOD</b>                    | <b>Linear range</b>               | <b>Ref.</b>      |
|---------------------------------|---------------------|-------------------------------|-----------------------------------|------------------|
| CoNP/Au (seed)/CNT/GC           | DPV                 | 0.5 $\mu\text{mol L}^{-1}$    | 5–2000 $\mu\text{mol L}^{-1}$     | [1]              |
| Hb/SA–MWCNT                     | CV                  | 16.41 $\mu\text{mol L}^{-1}$  | 40–200 $\mu\text{mol L}^{-1}$     | [2]              |
| Nafion/Mb/CGN/GCE               | DPV                 | 0.5 $\mu\text{mol L}^{-1}$    | 1.5–90 $\mu\text{mol L}^{-1}$     | [3]              |
| MoS <sub>2</sub> /graphene/CNTs | CV                  | 0.83 $\mu\text{mol L}^{-1}$   | 5–145 $\mu\text{mol L}^{-1}$      | [4]              |
| MWCNTs/cysteamine/nafion        | DPV                 | 0.01 $\mu\text{mol L}^{-1}$   | 0.1–70.0 $\mu\text{mol L}^{-1}$   | [5]              |
| <b>CTH/MWCNTs/GCE</b>           | <b>CV (415 mV)</b>  | <b>12 nmol L<sup>-1</sup></b> | <b>50-400 nmol L<sup>-1</sup></b> | <b>This Work</b> |
|                                 | <b>DPV(418 mV)</b>  | <b>5 nmol L<sup>-1</sup></b>  | <b>50-500 nmol L<sup>-1</sup></b> |                  |
|                                 | <b>CA (415 mV)*</b> | <b>9 nmol L<sup>-1</sup></b>  | <b>50-500 nmol L<sup>-1</sup></b> |                  |
|                                 |                     |                               | <b>50-500 nmol L<sup>-1</sup></b> |                  |

## References

1. R. Yue, Q. Lu and Y. Zhou, *Biosens. Bioelectron.*, 2011, 26, 4436–4441.
2. H. Y. Zhao, W. Zheng, Z. X. Meng, H. M. Zhou, X. X. Xu, Z. Li and Y. F. Zheng, *Biosens. Bioelectron.*, 2009, 24, 2352–2357.
3. D. Mao, J. Yao, X. Lai, M. Yang, J. Du and D. Wang, *Small.*, 2011, 7, 578–582.

4. M. Govindasamy *et al.* Int. J. Electrochem. Sci., 2016, 11, 2954–2961.
5. E.Canbay, B. Şahin, M. Kıran, and E. Akyilmaz, Bioelectrochem., 2015, 101, 126–131.
